# Supplementary material
Source: publisher figshare collection journal article supplement (https://acs.figshare.com/ndownloader/files/3863848)
Supplement: Supplementary file 1 [file 3863848]

## **Supporting Information**

# **Fe-based MOFs for Photocatalytic CO<sub>2</sub> Reduction: Role of Coordination Unsaturated Sites and Dual Excitation Pathways**

*Dengke Wang, Renkun Huang, Wenjun Liu, Dengrong Sun, Zhaohui Li\**

Research Institute of Photocatalysis, State Key Laboratory of Photocatalysis on Energy and Environment,  
College of Chemistry, Fuzhou University, Fuzhou 350002, China

Corresponding E-mail: zhaohuili1969@yahoo.com

**Figure S1** TG of the as-prepared MIL-101(Fe).

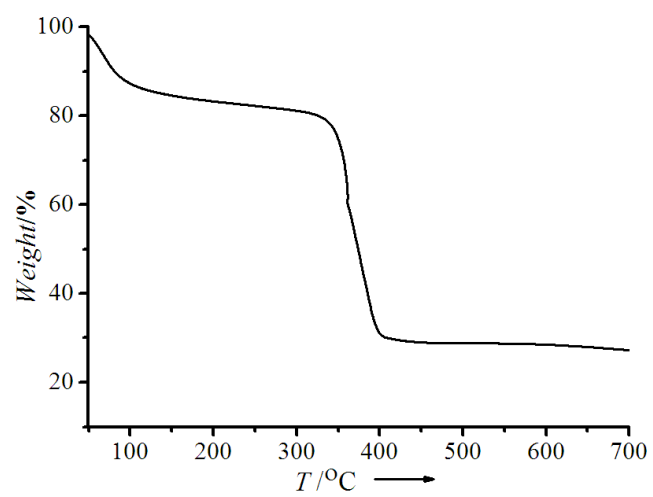

**Figure S2** N<sub>2</sub> adsorption/desorption of the as-prepared MIL-101(Fe).

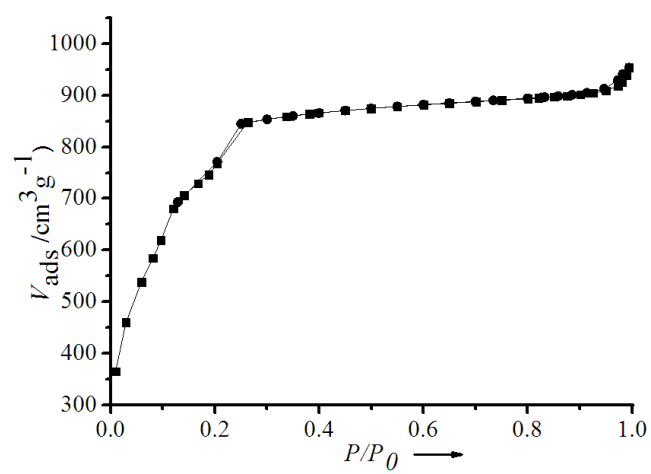

**Figure S3** The  $^{13}\text{C}$  NMR spectra for the product obtained from the reaction with  $^{12}\text{CO}_2$

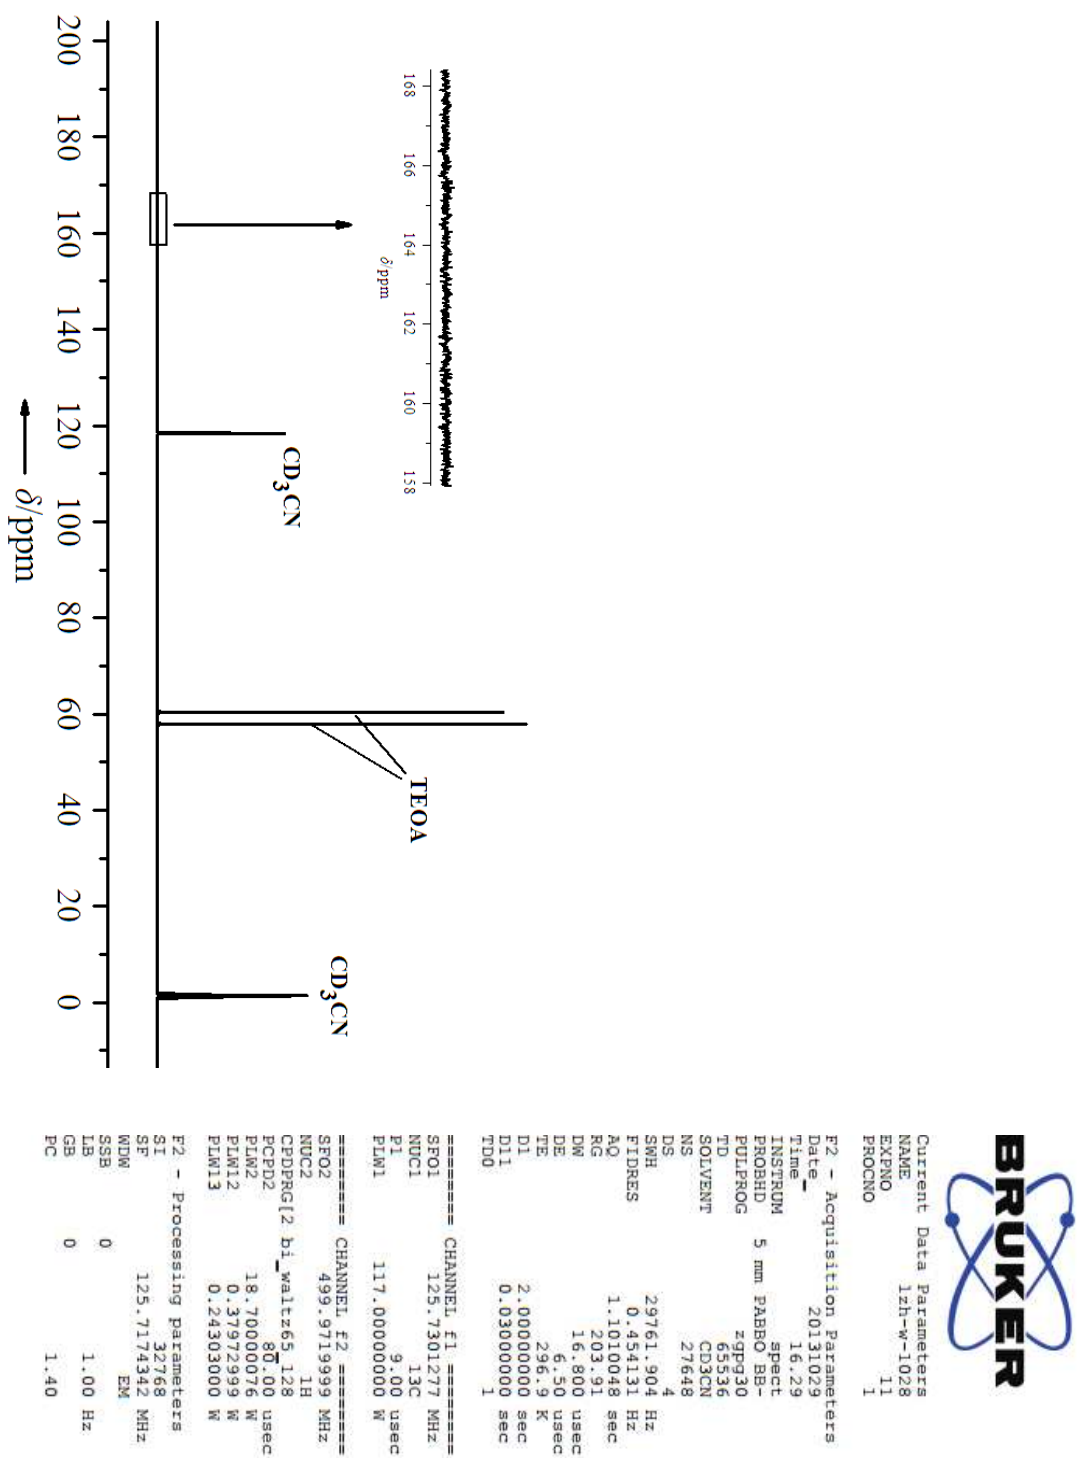

**Figure S4** The  $^{13}\text{C}$  NMR spectra for the product obtained from the reaction with  $^{13}\text{CO}_2$

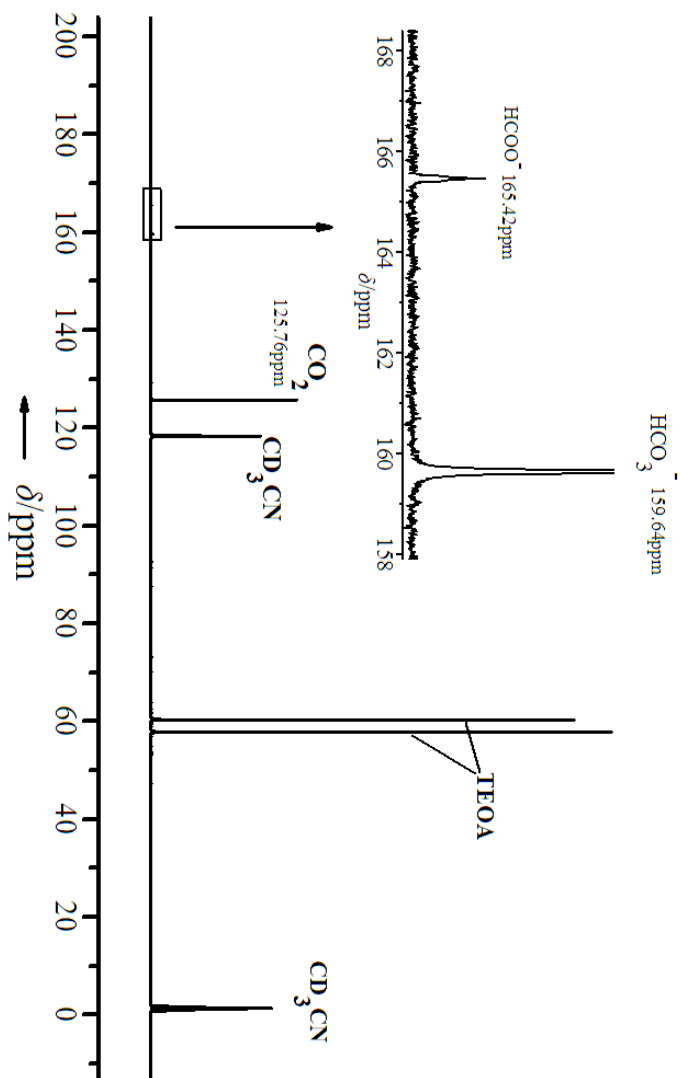

Current Data Parameters  
NAME 1zh-w-1028  
EXPNO 11  
PROCNO 1

F2 - Acquisition Parameters  
Date\_ 20131029  
Time 16.29  
INSTRUM spect  
PROBHD 5 mm PABBO-BB-  
PULPROG zgpg30  
TD 65536  
SOLVENT CD3CN  
NS 27648  
DS 4  
SWH 29761.904 Hz  
FIDRES 0.454131 Hz  
AQ 1.1010048 sec  
RG 203.91  
DW 16.800 usec  
DE 6.50 usec  
TE 296.9 K  
D1 2.0000000 sec  
D11 0.0300000 sec  
TD0 1

===== CHANNEL f1 =====  
SFO1 125.7301277 MHz  
NUC1 13C  
P1 9.00 usec  
PLW1 117.00000000 W

===== CHANNEL f2 =====  
SFO2 499.9719999 MHz  
NUC2 1H  
CPDPRG2 b1\_waltz65\_128  
PCPD2 80.00 usec  
PLW2 18.70000076 W  
PLW12 0.37972999 W  
PLW13 0.24303000 W

F2 - Processing parameters  
SI 32768  
SF 125.7174342 MHz  
WDW EM  
SSB 0  
LB 1.00 Hz  
GB 0  
PC 1.40

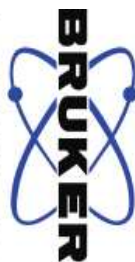

**Figure S5** The amount of  $\text{HCOO}^-$  produced as a function of the irradiation time over MIL-101(Fe) (at 8 h, the solid was removed from the reaction system)

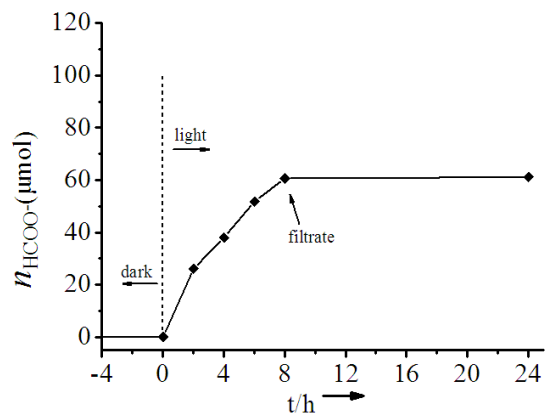

**Figure S6** The recycling use of MIL-101(Fe) for photocatalytic CO<sub>2</sub> reduction

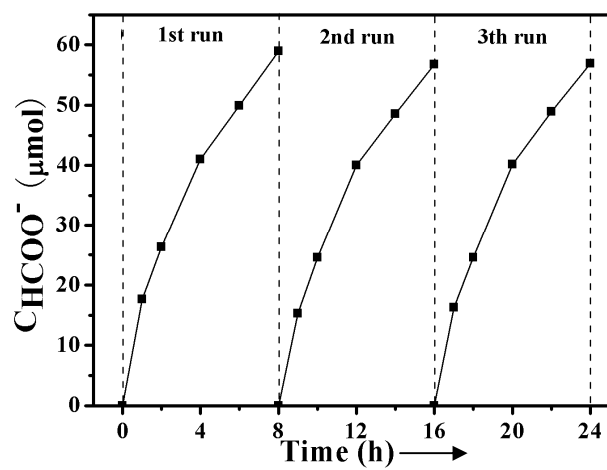

**Figure S7** XRD of MIL-101(Fe) (fresh and after the photocatalytic reaction)

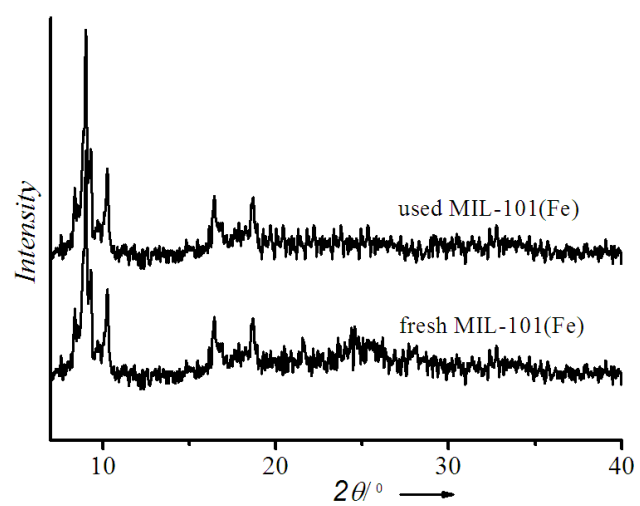



**Figure S8** IR of MIL-101(Fe) (fresh and after the photocatalytic reaction)

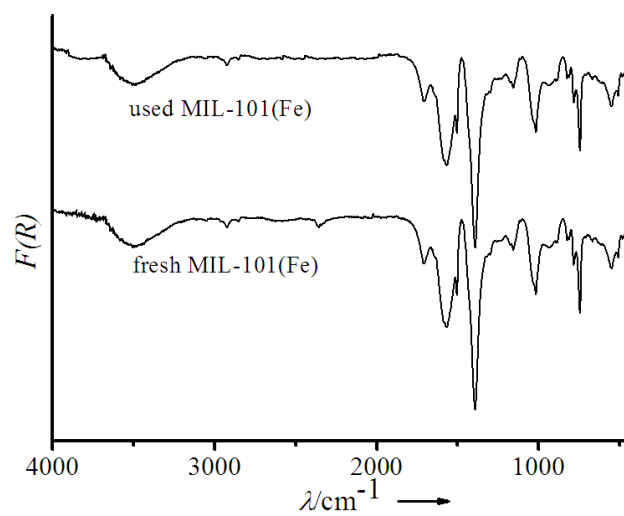

**Figure S9** TG of MIL-101(Fe) (fresh and after the photocatalytic reaction)

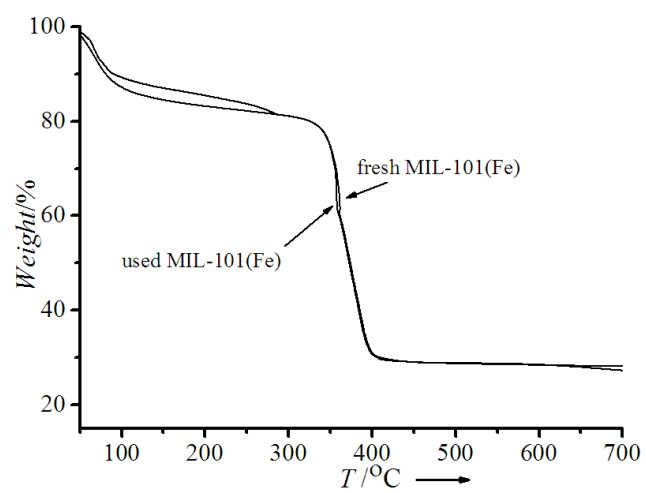

**Figure S10** N<sub>2</sub> adsorption/desorption isotherm of MIL-101(Fe) (fresh and after the photocatalytic reaction)

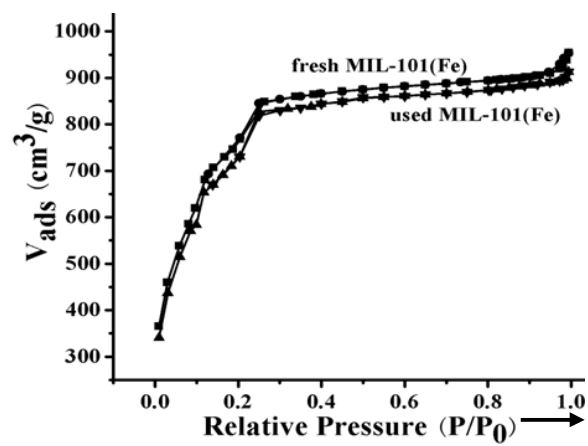

**Figure S11** Mott–Schottky plots for MIL-101(Fe). The ac amplitude is 20 mV and the frequency is in the range 0.5–1.5 KHz.

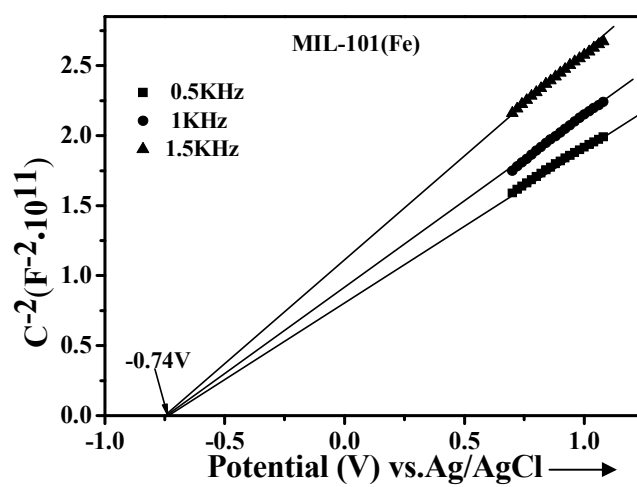

**Figure S12** XRD of MIL-53(Fe) (fresh and after the photocatalytic reaction)

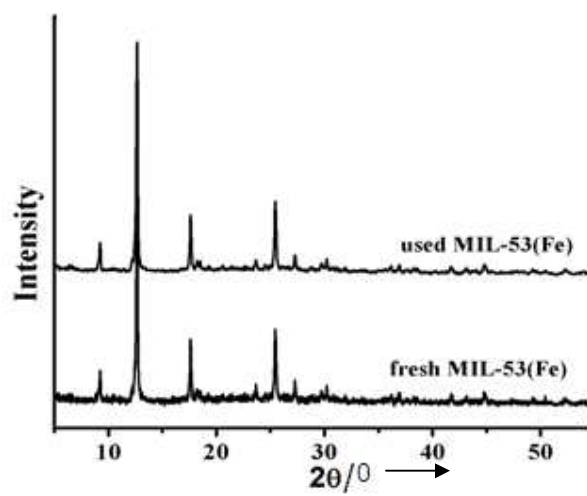

**Figure S13** TG of MIL-53(Fe) (fresh and after the photocatalytic reaction)

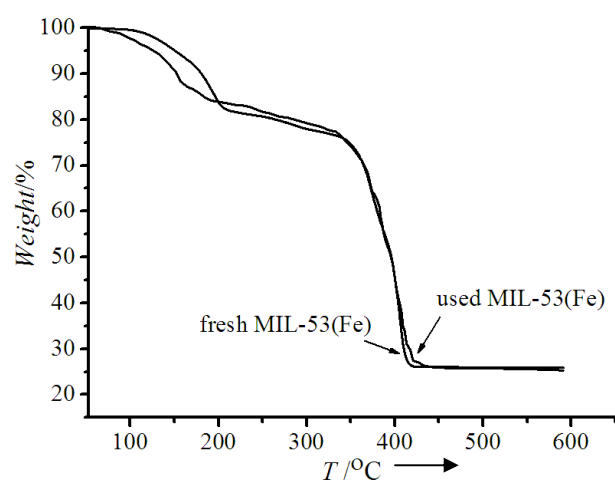

**Figure S14** XRD of MIL-88B (Fe) (fresh and after the photocatalytic reaction)

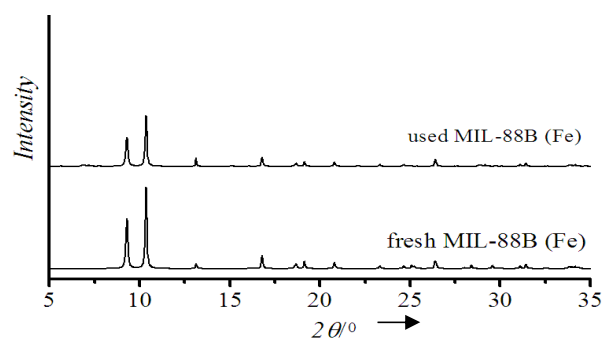

**Figure S15** TG of MIL-88B(Fe) (fresh and after the photocatalytic reaction)

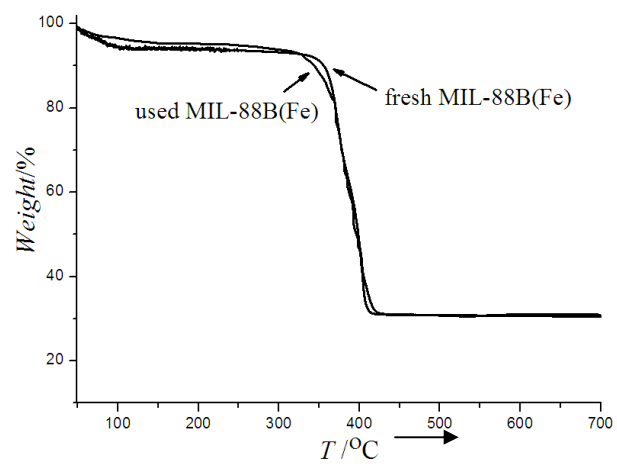



**Figure S16** UV-vis spectra of MIL-53(Fe) and NH<sub>2</sub>-MIL-53(Fe)

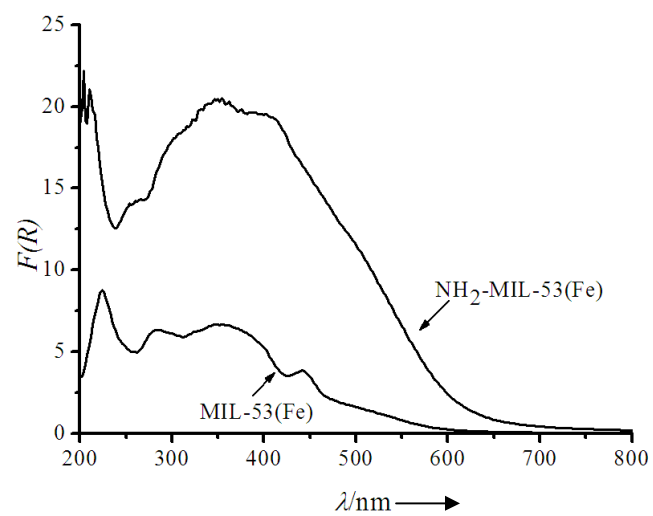

**Figure S17** UV-vis spectra of MIL-88B(Fe) and NH<sub>2</sub>-MIL-88B(Fe)

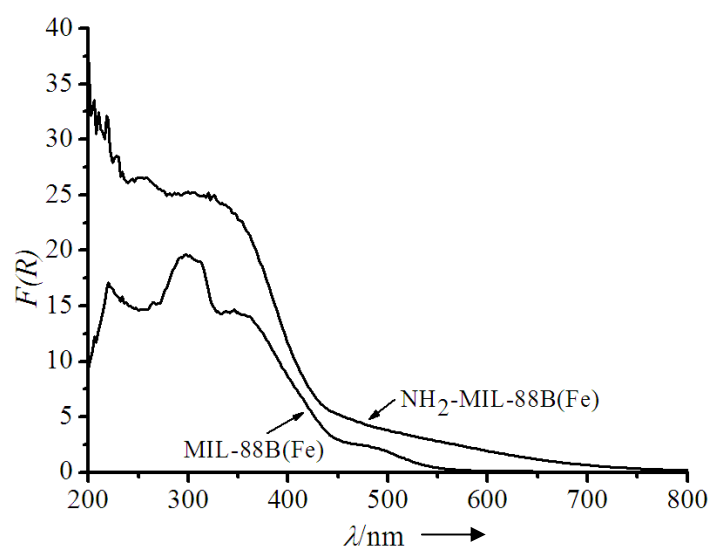

**Figure S18** The amount of  $\text{HCOO}^-$  produced as a function of the irradiation time over MIL-53(Fe).

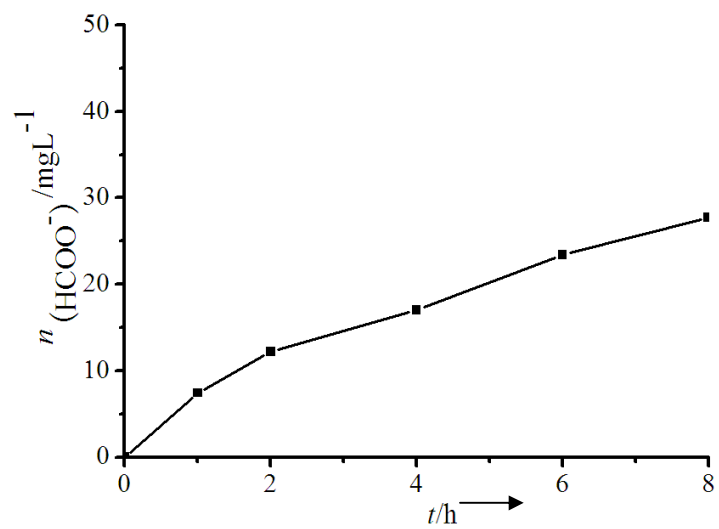

**Figure S19** The amount of  $\text{HCOO}^-$  produced as a function of the irradiation time over MIL-88B(Fe).

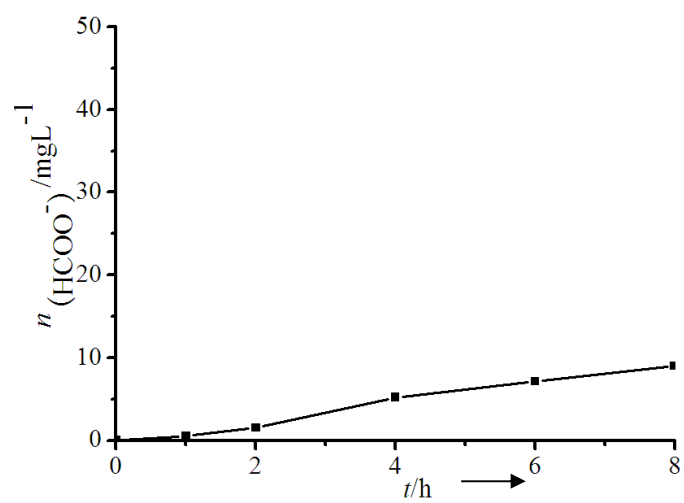

**Figure S20** Mott–Schottky plots for MIL-53(Fe). The ac amplitude is 20 mV and the frequency is in the range 0.5–1.5 KHz.

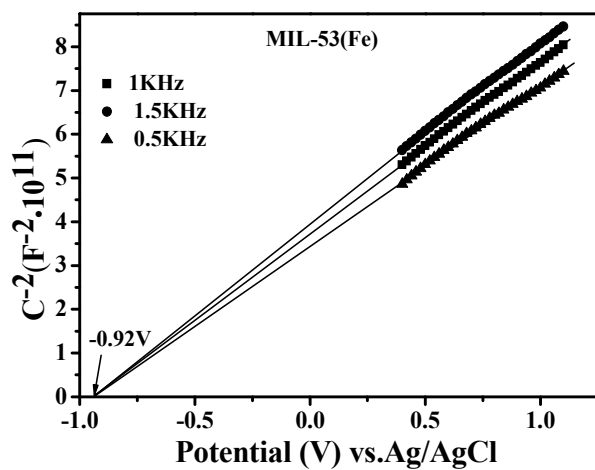

**Figure S21** Mott–Schottky plots for MIL-88B(Fe). The ac amplitude is 20 mV and the frequency is in the range 0.5–1.5 KHz.

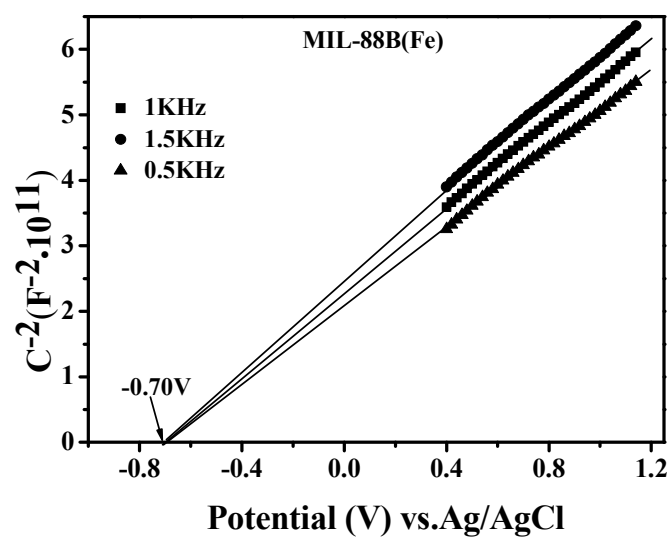

**Figure S22** CO<sub>2</sub> adsorption isotherms (1 atm, 273K) of (a) MIL-101(Fe); (b) MIL-53(Fe); (c) MIL-88(Fe).

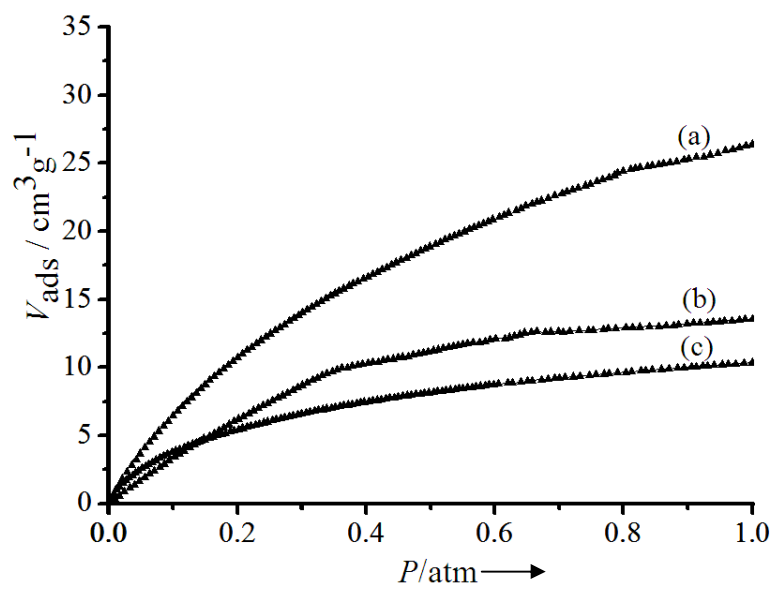

**Figure S23** In situ FT-IR analyses of CO<sub>2</sub> adsorption process over pretreated MIL-53(Fe).

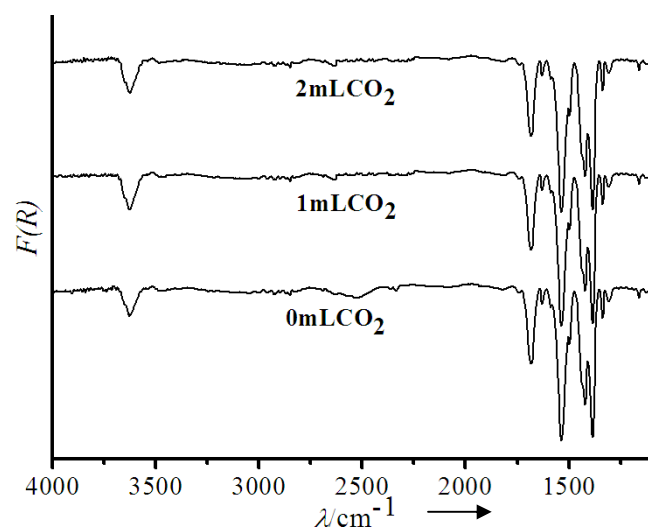



**Figure S24** In situ FT-IR analyses of CO<sub>2</sub> adsorption process over pretreated MIL-88B(Fe).

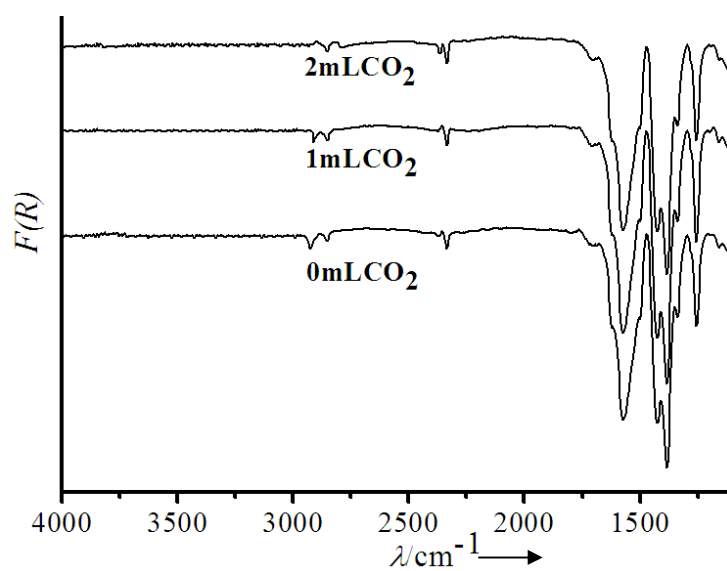

**Figure S25** XRD pattern of  $\text{NH}_2\text{-MIL-53(Fe)}$ .

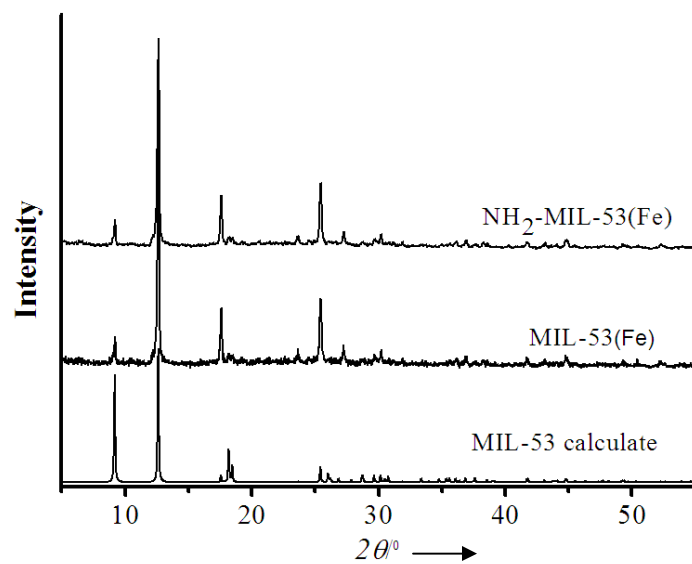

**Figure S26** XRD pattern of  $\text{NH}_2\text{-MIL-88B(Fe)}$ .

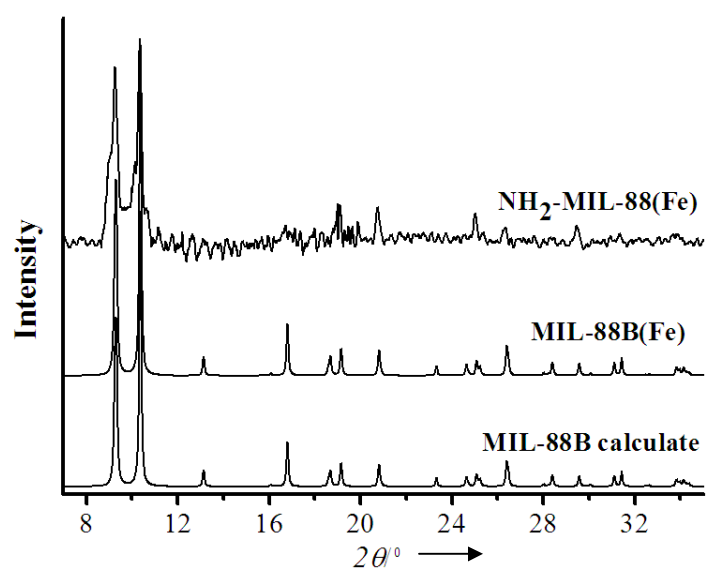

**Figure S27** FT-IR spectrum of NH<sub>2</sub>-MIL-101(Fe).

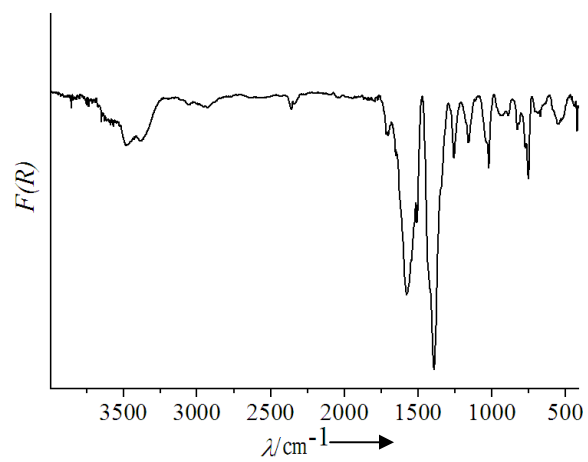

**Figure S28** FT-IR spectrum of NH<sub>2</sub>-MIL-53 (Fe).

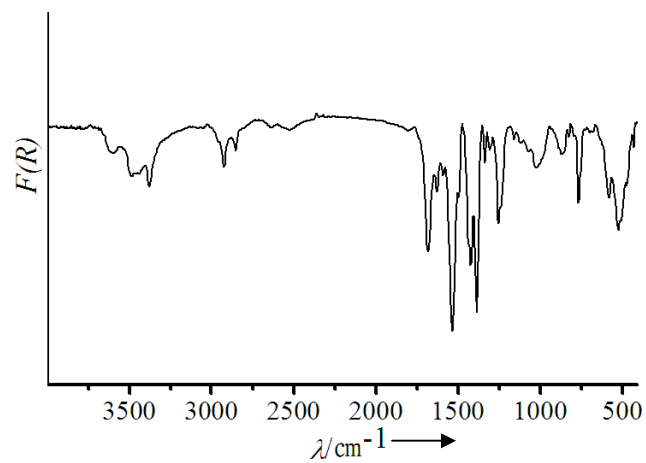

**Figure S29** FT-IR spectrum of NH<sub>2</sub>-MIL-88B(Fe).

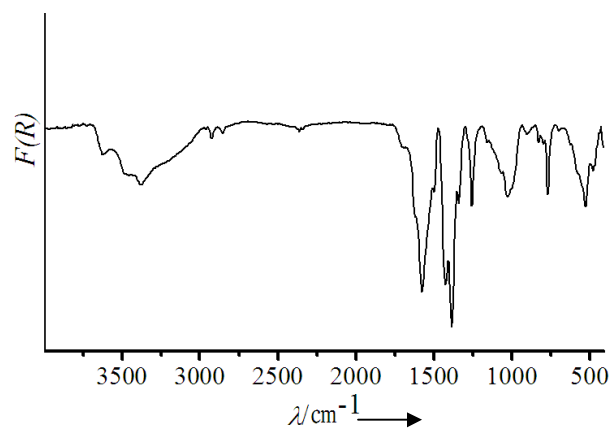

**Figure S30** N<sub>2</sub> adsorption/desorption isotherm of NH<sub>2</sub>-MIL-101(Fe).

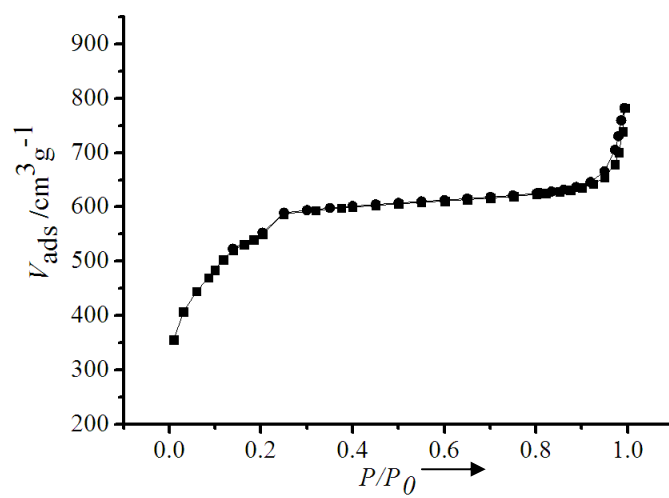

**Figure S31** TG of NH<sub>2</sub>-MIL-101(Fe).

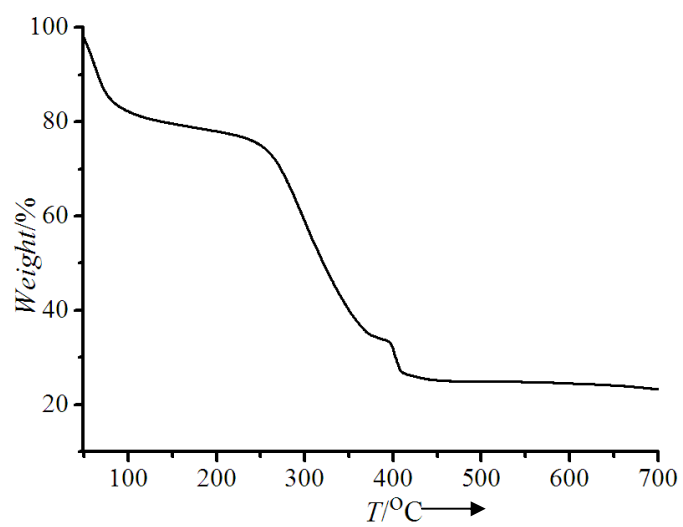



**Figure S32** TG of NH<sub>2</sub>-MIL-53(Fe).

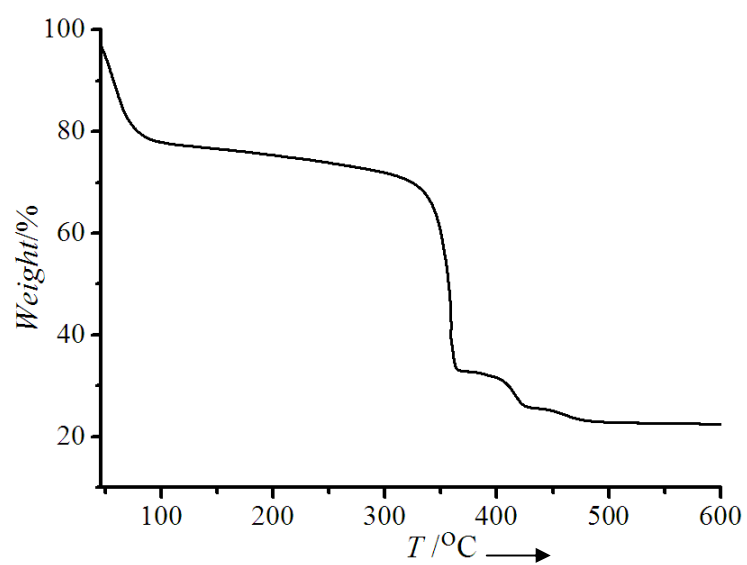

**Figure S33** TG of NH<sub>2</sub>-MIL-88B(Fe).

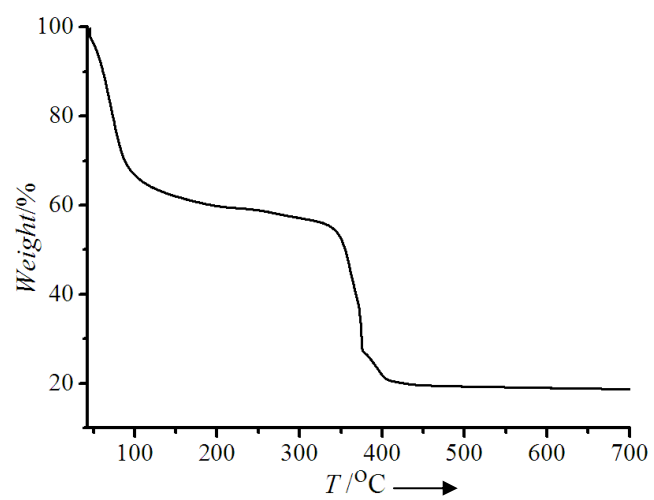

**Figure S34** CO<sub>2</sub> adsorption isotherms (1 atm, 273K) of (a) NH<sub>2</sub>-MIL-101(Fe); (b) NH<sub>2</sub>-MIL-53(Fe); (c) NH<sub>2</sub>-MIL-88(Fe).

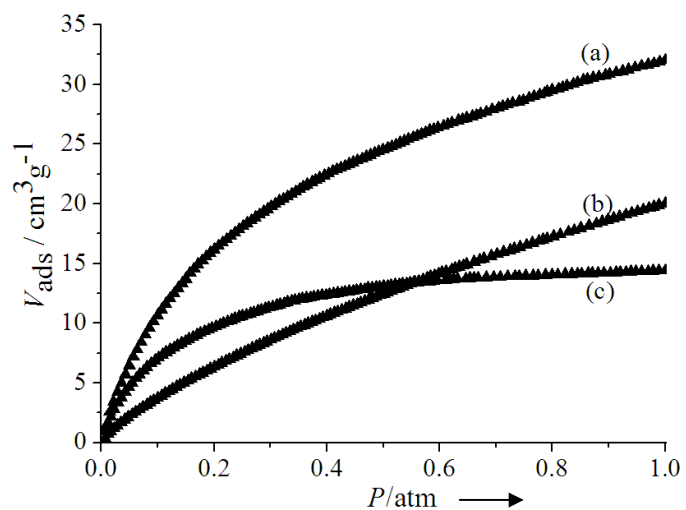

**Table S1** QE for photocatalytic CO<sub>2</sub> reduction over NH<sub>2</sub>-MIL-101(Fe) and MIL-101(Fe) at different wavelength

| Sample                       | wavelength/nm | QE ( $\times 10^{-4}$ ) |
|------------------------------|---------------|-------------------------|
| NH <sub>2</sub> -MIL-101(Fe) | 450           | 1.3                     |
|                              | 500           | 0.7                     |
|                              | 550           | 0.6                     |
| MIL-101(Fe)                  | 450           | 0.8                     |
|                              | 500           | 0.3                     |
|                              | 550           | 0.2                     |
